# Supplementary material for: Cost–utility analysis of mogamulizumab in advanced mycosis fungoides and Sézary syndrome cutaneous T-cell lymphoma
Source: Atypon-hosted journal article supplement (doi:10.57264/cer-2023-0028), 2023-06-20
Supplement: supplementary materials.docx [file supplementary%20materials.docx]

**Naïve comparison of the MAVORIC trial and ALCANZA trial progression-free survival curves**

Figure 1: Kaplan–Meier investigator-assessed progression-free survival curves for observed vorinostat (MAVORIC trial - ITT) versus physician’s choice (ALCANZA trial - ITT) – 2016 data cut


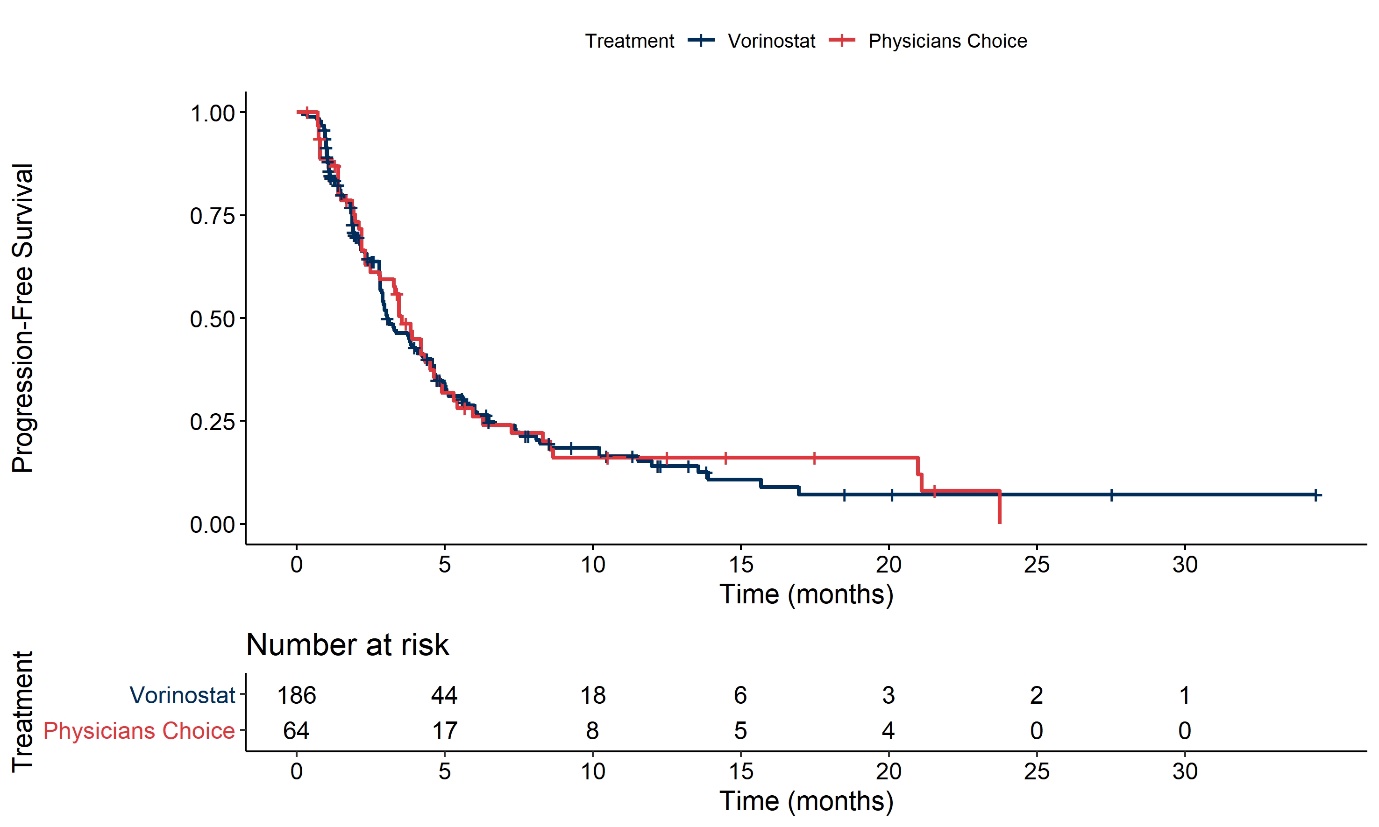


Abbreviations: ITT, intention-to-treat.

**Survival analysis for overall survival (OS)**

Figure 1: Diagnostic plots for re-weighted MAVORIC trial OS - 3rd line advanced MF and 2nd line SS population

**
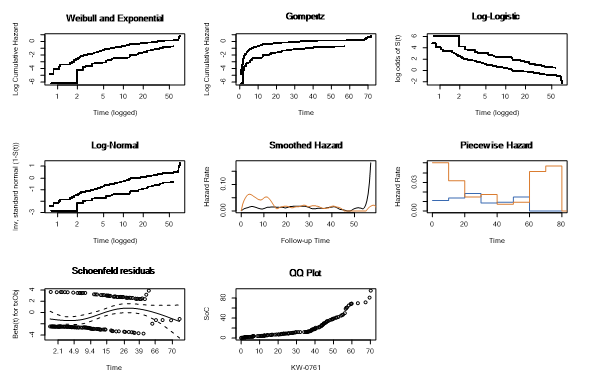
**

Abbreviations: OS, overall survival; MF, mycosis fungoides; SS, Sezary syndrome

Table 1: AIC and BIC statistics OS – 3rd line advanced MF and 2nd line SS population

| **Model** | **AIC HES** | **BIC HES** | **AIC Mogamulizumab** | **BIC Mogamulizumab** |
| --- | --- | --- | --- | --- |
| Exponential | 690.50 | 693.30 | 339.20 | 342.20 |
| Generalised Gamma | 668.90 | 677.40 | 341.50 | 350.30 |
| Gompertz | 680.30 | 685.90 | 340.90 | 346.80 |
| Log-logistic | 676.80 | 682.50 | 340.40 | 346.30 |
| Log-normal | 671.80 | 677.50 | 339.60 | 345.40 |
| Weibull | 685.20 | 690.90 | 341.20 | 347.10 |

Abbreviations: AIC: Akaike Information Criterion, BIC: Bayesian Information Criterion; MF, mycosis fungoides; SS, Sezary syndrome; OS, overall survival; HES, Hospital Episode Statistics.

Figure 2: Comparison of OS extrapolations between re-weighted MAVORIC mogamulizumab arm and HES data, 3rd line advanced MF and 2nd line SS population


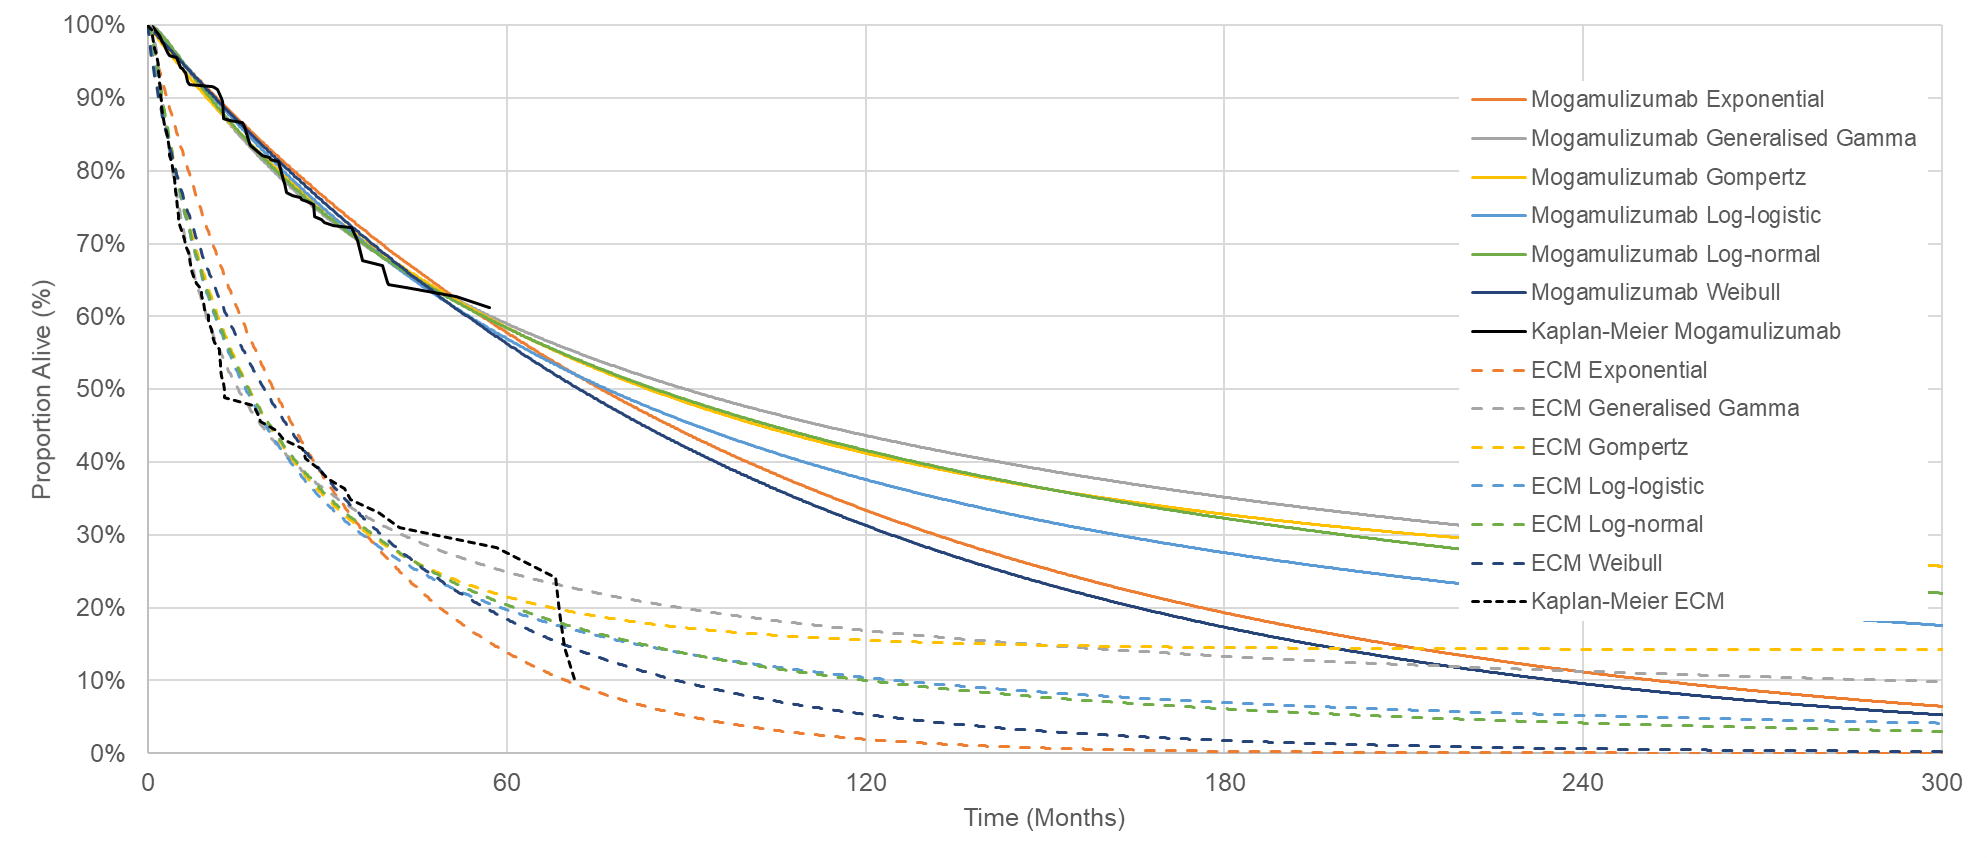


Abbreviations: ECM, established clinical management; OS, overall survival; HES, Hospital Episode Statistic; mycosis fungoides; SS, Sezary syndrome

**Survival analysis for next-treatment-free survival (NTFS)**

Figure 6: Diagnostic plots for re-weighted MAVORIC trial NTFS, 3rd line advanced MF and 2nd line SS population


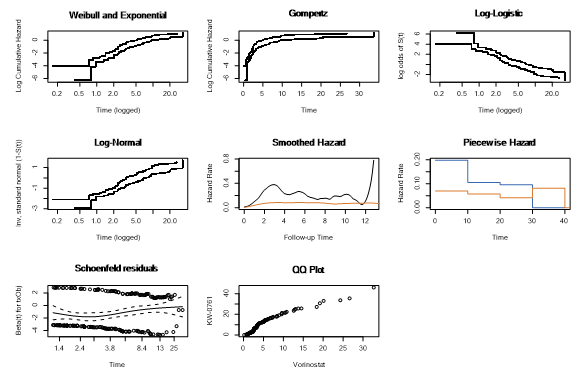


Abbreviations: NTFS, next-treatment-free survival; MF, mycosis fungoides; SS, Sezary syndrome

Table 2: AIC and BIC statistics for parametric survival model fits to NTFS Kaplan-Meier data, 3rd line advanced MF and 2nd line SS population

| Model | AIC V | AIC M | Joint | BIC V | BIC M | Joint |
| --- | --- | --- | --- | --- | --- | --- |
| Exponential | 399.80 | 529.60 | 929.40 | 402.70 | 532.50 | 936.50 |
| Weibull | 386.80 | 517.90 | 902.40 | 395.30 | 526.70 | 916.70 |
| Log-normal | 395.40 | 530.60 | 925.70 | 401.10 | 536.50 | 936.40 |
| Log-logistic | 379.00 | 520.40 | 899.30 | 384.70 | 526.30 | 910.00 |
| Generalised Gamma | 384.90 | 517.90 | 901.40 | 390.60 | 523.80 | 912.20 |
| Gompertz | 401.80 | 531.00 | 931.00 | 407.50 | 536.90 | 941.70 |

Abbreviations: AIC; Akaike Information Criterion, BIC: Bayesian Information Criterion; NTFS, next-treatment-free survival; MF, mycosis fungoides; SS, Sezary syndrome; V, vorinostat; M, mogamulizumab.

Figure 7: Reweighted MAVORIC NTFS, 3rd line advanced MF and 2nd line SS population


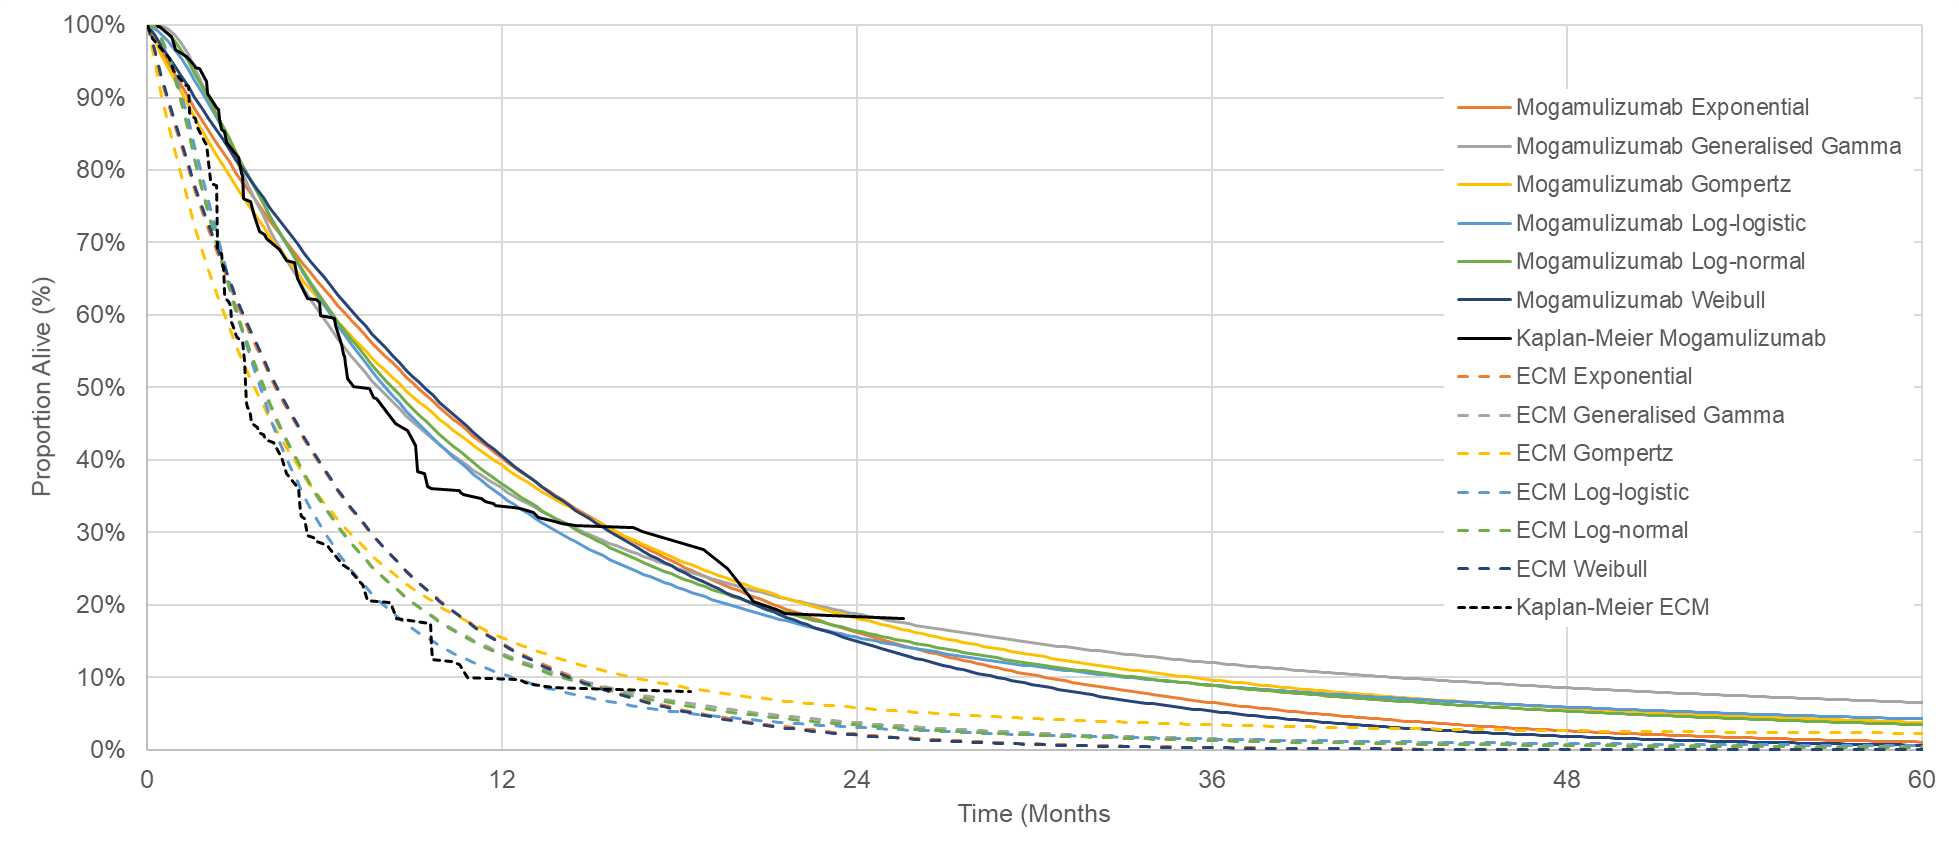


Abbreviations: NTFS, next-treatment-free survival; MF, mycosis fungoides; SS, Sezary syndrome
